# Supplementary material
Source: Elsevier journal article supplement (https://www.sciencedirect.com/science/article/pii/S0001731022001508)
Supplement: mmc1 [file S0001731022001508:mmc1.docx]

# MATERIAL COMPLEMENTARIO

Tabla S 1. Términos utilizados y estrategia de búsqueda para PubMed/MEDLINE

| **Pubmed/MEDLINE** | | |
| --- | --- | --- |
| **Términos y estrategia de búsqueda relacionados con la enfermedad** | **#1** | ("Atopic dermatitis" O "Dermatitis, atopic" [MesH] O "atopic eczema" O "Pruritus" O "Pruritus" [MesH] O "Itching" O "Itch") |
| **Términos y estrategia de búsqueda relacionados con las PRO y PROM** | **#2** | (“Patient reported outcomes” O “PRO” O “PROM” O “Patient Reported Outcome Measures“ O “Patient Reported Outcome Measures “[MesH] O “Health related quality of life” O “Quality of life” O “Quality of life” [MesH] O “HRQoL” O “QoL” O “adherence” O “medication adherence” [Mesh] O “compliance” O “satisfaction” O “patient satisfaction” [Mesh] O “preferences” O “patient preference” [Mesh] O “Sleeplessness” O “Sleep disturbance” O “sleep disorders” O “insomnia” O “Work productivity” O “WPAI” O “Activity Impairment “O “SCORAD” O “scoring atopic dermatitis” O “POEM” O “Patient oriented eczema measure“ O “DLQI” O “Dermatology Life Quality Index” O “DQoL” O “Dermatology quality of life” O “SF36” O “EQ5D” O “HADS” O “Hospital Anxiety and Depression Scale“ O “VAS” O “Visual analogue scale” O “NRS” O “numerical rating scale” O “VRS” O “verbal rating scale” O “ItchyQOL” O “5-D itch scale” O “Itch severity scale” O “DFI” O “dermatitis family impact” O “CADIS” O “childhood atopic dermatitis impact scale”) |
| **Términos y estrategia de búsqueda relacionados con el país de interés** | **#3** | ("Spain" O "Spanish") |
| **Estrategia de búsqueda en Pubmed/MEDLINE** | **#1 AND #2 AND #3** | |
| **MEDES/ IBECS** | | |
| Los términos descritos en **#1, #2 and #3** fueron libremente combinados con el operador booleano “AND” | | |
